# Supplementary material
Source: PubMed Central journal article supplement (PMC2662648)
Supplement: blood-2008-09-179895_2.pdf [file blood-2008-09-179895_2.pdf]

| Patient | Category | Nucleotide change                                | Amino acid change        | Comment                                        |
|---------|----------|--------------------------------------------------|--------------------------|------------------------------------------------|
| 1316    | double   | 357del                                           | D69fsX159                | N-terminal stop                                |
|         |          | 1106_1107insACT                                  | S319delinsRL             | In-frame insertion in bZIP                     |
| 2169    | double   | 213del                                           | P22fsX159                | N-terminal stop                                |
|         |          | 1066_1067insGCAACGTGGACAAGCAGC                   | V308_E309insDKQRNV       | In-frame insertion in bZIP                     |
| 2192    | double   | ins396GG                                         | L81fsX160                | N-terminal stop                                |
|         |          | 1060_1062dup                                     | K304dup                  | In-frame duplication in bZIP                   |
| 2218    | double   | 1062_1094dup (homozygous)                        | Q305_L315dup             | In-frame duplication in bZIP                   |
| 2230    | double   | 381del                                           | F57fsX159                | N-terminal stop                                |
|         |          | 1076_1078dup                                     | E309_T310insK            | In-frame insertion in bZIP                     |
| 2234    | double   | 392_395dup                                       | F82fsX108                | N-terminal stop                                |
|         |          | 1084_1089dup, 1090G>A                            | V314delinsQKM            | In-frame insertion in bZIP                     |
| 2240    | double   | 332del                                           | S161fsX159               | N-terminal stop                                |
|         |          | 1076_1078dup                                     | E309_T310insK            | In-frame insertion in bZIP                     |
| 2242    | double   | 252_261del                                       | P34fsX156                | N-terminal stop                                |
|         |          | 1064_1066dup                                     | Q305dup                  | In-frame duplication in bZIP                   |
| 2253    | double   | 213del                                           | P22fsX159                | N-terminal stop                                |
|         |          | 1051_1052insGACAAGGCCAAGCAGCGCAACGTGGAGACGCAGCAC | T310_Q311insQHHKAKQRNVET | In-frame insertion in bZIP                     |
| 2273    | double   | 472_473insT                                      | D107fsX169               | N-terminal stop                                |
|         |          | 1062_1079dup                                     | R306_Q311dup             | In-frame duplication in bZIP                   |
| 2545    | double   | 474C>G                                           | P108X                    | N-terminal stop                                |
|         |          | 813del                                           | L220fsX317               | Frameshift between TAD2 and bZIP, stop in bZIP |
| 2748    | double   | 424_425insA                                      | K92fsX107                | N-terminal stop                                |
|         |          | 1057_1058insTTG                                  | K302_A303insV            | In-frame insertion in bZIP                     |
| 2753    | double   | 302_317del                                       | P51fsX154                | N-terminal stop                                |
|         |          | 1085_1087dup                                     | K313dup                  | In-frame duplication in bZIP                   |
| 3101    | double   | 362_363insCC (homozygous)                        | A71fsX160                | N-terminal stop                                |
| 3117    | double   | 397del                                           | F82fsX159                | N-terminal stop                                |
|         |          | 1087_1089dup                                     | K313dup                  | In-frame duplication in bZIP                   |
| 3327    | double   | 1104_1115del (homozygous)                        | S319_D322del             | In-frame deletion in bZIP                      |

|             |        |                                                                                                                                                   |                      |                                                |
|-------------|--------|---------------------------------------------------------------------------------------------------------------------------------------------------|----------------------|------------------------------------------------|
| <b>4336</b> | double | 218_219insC                                                                                                                                       | P23fsX107            | N-terminal stop                                |
|             |        | 1016G>C                                                                                                                                           | R289P                | Substitution in bZIP                           |
| <b>5352</b> | double | 311del                                                                                                                                            | G53fsX159            | N-terminal stop                                |
|             |        | 679_691dup                                                                                                                                        | P180fsX324           | Frameshift between TAD1 and TAD2, stop in bZIP |
| <b>5362</b> | double | 349_359del                                                                                                                                        | A66fsX103            | N-terminal stop                                |
|             |        | 1033G>C                                                                                                                                           | A295P                | Substitution in bZIP                           |
| <b>5364</b> | double | 376_377insG                                                                                                                                       | D75fsX107            | N-terminal stop                                |
|             |        | 486_522dup                                                                                                                                        | A124fsX181           | Frameshift, stop in TAD2                       |
| <b>6376</b> | double | 1091_1092insTGCTGGAGCTGCAGCGCAACGTGGAGACGCAGCAGAAGG (homozygous)                                                                                  | Q305_L317dup         | In-frame duplication in bZIP                   |
| <b>6735</b> | double | 377_389del                                                                                                                                        | D75fsX155            | N-terminal stop                                |
|             |        | 1084_1086dup                                                                                                                                      | Q312dup              | In-frame duplication in bZIP                   |
| <b>6975</b> | double | 397C>T                                                                                                                                            | Q83X                 | N-terminal stop                                |
|             |        | 1073_1075dup                                                                                                                                      | V308dup              | In-frame duplication in bZIP                   |
| <b>7127</b> | double | 437del                                                                                                                                            | V95fsX159            | N-terminal stop                                |
|             |        | 1087_1089dup                                                                                                                                      | K313dup              | In-frame duplication in bZIP                   |
| <b>7142</b> | double | 354delCG                                                                                                                                          | I68fsX106            | N-terminal stop                                |
|             |        | 1087_1089dup                                                                                                                                      | K313dup              | In-frame duplication in bZIP                   |
| <b>7148</b> | double | 248_249del                                                                                                                                        | G32fsX106            | N-terminal stop                                |
|             |        | 1072_1073insGTGGAGACGCAGCACCTAAAATCG                                                                                                              | Q311_Q312insHLKSVETQ | In-frame insertion in bZIP                     |
| <b>7149</b> | double | 382del                                                                                                                                            | F77fsX159            | N-terminal stop                                |
|             |        | 1087_1089dup                                                                                                                                      | K313dup              | In-frame duplication in bZIP                   |
| <b>7406</b> | double | 406_412del                                                                                                                                        | R86fsX157            | N-terminal stop                                |
|             |        | 1084_1086dup                                                                                                                                      | Q312dup              | In-frame duplication in bZIP                   |
| <b>2176</b> | single | 218_219insC                                                                                                                                       | P23fsX107            | N-terminal stop                                |
| <b>2188</b> | single | 852_858dup                                                                                                                                        | P239fsX322           | Frameshift between TAD2 and bZIP, stop in bZIP |
| <b>2194</b> | single | 468_469insAACC                                                                                                                                    | D105fsX108           | N-terminal stop                                |
| <b>2237</b> | single | 1188_1189insAGCGCAACGTGGAGACGCAGCAGAAGGTGCTGGAGCTGACCAGTGACAA<br>TGACCGCTGCGCAAGCGGGTGGAAACAGCTGAGCCGCGAACTGGACACGCTGCGGGGC<br>ATCTTCCGCCAGCTGCCA | P346fsX359           | Frameshift and stop in bZIP                    |
| <b>3096</b> | single | 1114_1134del                                                                                                                                      | D322_V328del         | In-frame deletion in bZIP                      |

|              |              |                    |               |                             |
|--------------|--------------|--------------------|---------------|-----------------------------|
| <b>4341</b>  | single       | 309_311delinsTT    | G53fsX159     | N-terminal stop             |
| <b>6247</b>  | single       | 564_565insTA       | Y138fsX160    | N-terminal stop             |
| <b>6362</b>  | single       | 648_649insG        | E166fsX169    | N-terminal stop             |
| <b>6462</b>  | single       | 445_446insCCAA     | T98fsX108     | N-terminal stop             |
| <b>7075</b>  | single       | 218_219insC        | P22fsX107     | N-terminal stop             |
| <b>7185</b>  | single       | 1029_1030insGGACCC | N293delinsKDP | In-frame insertion in bZIP  |
| <b>7302</b>  | single       | 505del             | A118fsX159    | N-terminal stop             |
| <b>7324</b>  | single       | 1075_1203dup       | V351fsX402    | Frameshift and stop in bZIP |
| <b>2183#</b> | not included | 722-736dup         | H191_H195dup  | Duplication in TAD2         |
| <b>5359#</b> | not included | 575G>C             | R142T         | Substitution in TAD2        |

bZIP indicates basic leucine zipper region; TAD1, first transactivation domain; and, TAD2, second transactivation domain. Column “category” indicates whether a case was considered double or single *CEBPA* mutant AML in gene expression profiling and survival analyses. Nucleotide numbering is according to NCBI Entrez accession no. XM\_009180.3, in which the major translational start codon starts at nucleotide position 151. All mutations are heterozygous, unless “homozygous” is specifically indicated. The locations of functional domains are derived from Mueller and Pabst.<sup>1</sup>

\* AML case not included in gene expression profiling and survival analyses because data not available.

# AML case considered to be non-mutant in gene expression profiling and survival analysis; see main text.

#### REFERENCE

1. Mueller BU, Pabst T. C/EBPalpha and the pathophysiology of acute myeloid leukemia. *Curr Opin Hematol.* 2006;13:7-14.
