# Supplementary material
Source: PubMed Central journal article supplement (PMC2662648)
Supplement: blood-2008-09-179895_4.pdf [file blood-2008-09-179895_4.pdf]

|    | <b>Probe Set ID</b> | <b>Gene Symbol</b> |
|----|---------------------|--------------------|
| 1  | 222423_at           | NDFIP1             |
| 2  | 1555630_a_at        | RAB34              |
| 3  | 211682_x_at         | UGT2B28            |
| 4  | 217800_s_at         | NDFIP1             |
| 5  | 223095_at           | MARVELD1           |
| 6  | 202252_at           | RAB13              |
| 7  | 1553183_at          | UMODL1             |
| 8  | 217853_at           | TNS3               |
| 9  | 1554300_a_at        | LOC136306          |
| 10 | 224710_at           | RAB34              |
| 11 | 201841_s_at         | HSPB1 /// MEIS3    |
| 12 | 222422_s_at         | NDFIP1             |
| 13 | 234247_at           | --                 |
| 14 | 227423_at           | LRRC28             |
| 15 | 200765_x_at         | CTNNA1             |
| 16 | 217226_s_at         | SFXN3              |
| 17 | 220393_at           | GLULD1             |
| 18 | 224822_at           | DLC1               |
| 19 | 220974_x_at         | SFXN3              |
| 20 | 215772_x_at         | SUCLG2             |
| 21 | 206726_at           | PGDS               |

Probe sets are indicated in the order of decreasing distance between shrunken centroids of the two AML classes considered, i.e. *CEBPA*<sup>double-mut</sup> versus *CEBPA*<sup>wt</sup>, with the most discriminating probe set on top.
