# Supplementary material
Source: PubMed Central journal article supplement (PMC2662648)
Supplement: blood-2008-09-179895_5.pdf [file blood-2008-09-179895_5.pdf]

|                                                   | <b>N (percentage) / Median (range)</b> |
|---------------------------------------------------|----------------------------------------|
| <b>Median follow-up time (months)<sup>#</sup></b> | 75.5                                   |
| <b>Sex</b>                                        |                                        |
| <i>Male</i>                                       | 263 (50)                               |
| <i>Female</i>                                     | 261 (50)                               |
| <b>Age</b>                                        | 46.5 (15.0 – 77.0)                     |
| <b>Age group</b>                                  |                                        |
| < 60                                              | 460 (88)                               |
| > 60                                              | 64 (12)                                |
| <b>HOVON protocol</b>                             |                                        |
| <i>04 / 04A</i>                                   | 99 (19)                                |
| <i>29</i>                                         | 213 (41)                               |
| <i>32</i>                                         | 5 (1)                                  |
| <i>42</i>                                         | 148 (28)                               |
| <i>43</i>                                         | 59 (11)                                |
| <b>Type of stem cell transplant</b>               |                                        |
| <i>None</i>                                       | 299 (57)                               |
| <i>Autologous</i>                                 | 70 (13)                                |
| <i>Allogeneic</i>                                 | 150 (29)                               |
| <i>Unknown</i>                                    | 5 (1)                                  |
| <b>WBC (x 10<sup>9</sup>/L)</b>                   | 28 (0 – 510)                           |
| <b>Blasts in bone marrow (%)</b>                  | 65 (0 – 98)                            |
| <b>Platelets (x 10<sup>9</sup>/L)</b>             | 55 (3 – 998)                           |
| <b>FAB</b>                                        |                                        |
| <i>M0</i>                                         | 18 (3)                                 |
| <i>M1</i>                                         | 105 (20)                               |
| <i>M2</i>                                         | 127 (24)                               |
| <i>M3</i>                                         | 25 (5)                                 |
| <i>M4</i>                                         | 87 (17)                                |
| <i>M5</i>                                         | 114 (22)                               |
| <i>M6</i>                                         | 7 (1)                                  |
| <i>RAEB-t</i>                                     | 19 (4)                                 |
| <i>RAEB</i>                                       | 4 (1)                                  |
| <i>M4E</i>                                        | 5 (1)                                  |
| <i>Unknown</i>                                    | 13 (2)                                 |
| <b>Cytogenetic risk group</b>                     |                                        |
| <i>Good</i>                                       | 103 (20)                               |
| <i>Intermediate</i>                               | 305 (56)                               |
| <i>Poor</i>                                       | 104 (20)                               |
| <i>Unknown</i>                                    | 12 (2)                                 |
| <b>Cytogenetics<sup>†</sup></b>                   |                                        |
| <i>Normal cytogenetics</i>                        | 214 (41)                               |
| <i>t(15;17)</i>                                   | 25 (5)                                 |
| <i>t(8;21)</i>                                    | 37 (7)                                 |
| <i>Inv(16)</i>                                    | 41 (8)                                 |

|                                            |          |
|--------------------------------------------|----------|
| <b>11q23</b>                               | 22 (4)   |
| <b>3q</b>                                  | 20 (4)   |
| <b>-5(q)</b>                               | 16 (3)   |
| <b>-7(q)</b>                               | 37 (7)   |
| <b>+chr8</b>                               | 37 (7)   |
| <b>Complex karyotype</b>                   | 33 (6)   |
| <b>Other cytogenetic abnormality</b>       | 130 (25) |
| <b>Molecular abnormalities<sup>†</sup></b> |          |
| <b>FLT3-ITD</b>                            | 141 (27) |
| <b>FLT3-TKD</b>                            | 53 (10)  |
| <b>NPM1</b>                                | 157 (30) |
| <b>NRAS</b>                                | 50 (10)  |
| <b>KRAS</b>                                | 5 (1)    |

Numbers of cases or median (range) are depicted where appropriate.

WBC indicates white blood cell count; and, FAB, French-American-British classification.

<sup>#</sup> Median follow-up time is given for patients alive at last follow-up.

<sup>†</sup> Each abnormality was taken into account, irrespective of the presence of other abnormalities.
