# Supplementary material
Source: PubMed Central journal article supplement (PMC2662648)
Supplement: blood-2008-09-179895_6.pdf [file blood-2008-09-179895_6.pdf]

|                                       | <i>CEBPA</i> <sup>wt</sup><br>(N=486) | <i>CEBPA</i> <sup>single-mut</sup><br>(N=12) | <i>CEBPA</i> <sup>double-mut</sup><br>(N=26) | <i>P</i> <sup>*</sup> |
|---------------------------------------|---------------------------------------|----------------------------------------------|----------------------------------------------|-----------------------|
| <b>Sex</b>                            |                                       |                                              |                                              | >0.99                 |
| <i>Male</i>                           | 240 (49)                              | 7 (58)                                       | 16 (62)                                      |                       |
| <i>Female</i>                         | 246 (51)                              | 5 (42)                                       | 10 (38)                                      |                       |
| <b>Age</b>                            | 46 (15 – 77)                          | 52 (20 – 70)                                 | 45 (16 – 75)                                 | 0.27                  |
| <b>Age group</b>                      |                                       |                                              |                                              | 0.58                  |
| < 60                                  | 426 (88)                              | 10 (83)                                      | 24 (92)                                      |                       |
| > 60                                  | 60 (12)                               | 2 (17)                                       | 2 (8)                                        |                       |
| <b>HOVON protocol</b>                 |                                       |                                              |                                              | 0.091                 |
| <i>04/04A</i>                         | 89 (18)                               | 4 (33)                                       | 6 (23)                                       |                       |
| <i>29</i>                             | 200 (41)                              | 1 (8)                                        | 12 (46)                                      |                       |
| <i>32</i>                             | 4 (1)                                 | 0 (0)                                        | 1 (4)                                        |                       |
| <i>42</i>                             | 137 (28)                              | 5 (42)                                       | 6 (23)                                       |                       |
| <i>43</i>                             | 56 (12)                               | 2 (17)                                       | 1 (4)                                        |                       |
| <b>Type of stem cell transplant</b>   |                                       |                                              |                                              | 0.25                  |
| <i>None</i>                           | 281 (58)                              | 8 (67)                                       | 10 (38)                                      |                       |
| <i>Autologous</i>                     | 62 (13)                               | 1 (8)                                        | 7 (27)                                       |                       |
| <i>Allogeneic</i>                     | 139 (29)                              | 3 (25)                                       | 8 (31)                                       |                       |
| <i>Unknown</i>                        | 4 (1)                                 | 0 (0)                                        | 1 (4)                                        |                       |
| <b>WBC (x 10<sup>9</sup>/L)</b>       | 28 (0 – 510)                          | 11 (3 – 263)                                 | 36 (3 – 174)                                 | 0.65                  |
| <b>Blasts in bone marrow (%)</b>      | 64 (0 – 98)                           | 70 (16 – 92)                                 | 65 (25 – 94)                                 | 0.66                  |
| <b>Platelets (x 10<sup>9</sup>/L)</b> | 55 (3 – 998)                          | 89 (18 – 174)                                | 51 (8 – 265)                                 | 0.087                 |
| <b>FAB</b>                            |                                       |                                              |                                              | 0.18                  |
| <i>M0</i>                             | 18 (4)                                | 0 (0)                                        | 0 (0)                                        |                       |
| <i>M1</i>                             | 87 (18)                               | 3 (25)                                       | 15 (58)                                      |                       |
| <i>M2</i>                             | 116 (24)                              | 4 (33)                                       | 7 (27)                                       |                       |
| <i>M3</i>                             | 25 (5)                                | 0 (0)                                        | 0 (0)                                        |                       |
| <i>M4</i>                             | 82 (17)                               | 3 (25)                                       | 2 (8)                                        |                       |
| <i>M5</i>                             | 113 (23)                              | 0 (0)                                        | 1 (4)                                        |                       |
| <i>M6</i>                             | 7 (1)                                 | 0 (0)                                        | 0 (0)                                        |                       |
| <i>RAEB-t</i>                         | 17 (3)                                | 1 (8)                                        | 1 (4)                                        |                       |
| <i>RAEB</i>                           | 4 (1)                                 | 0 (0)                                        | 0 (0)                                        |                       |
| <i>M4E</i>                            | 5 (1)                                 | 0 (0)                                        | 0 (0)                                        |                       |
| <i>Unknown</i>                        | 12 (2)                                | 1 (8)                                        | 0 (0)                                        |                       |
| <b>Cytogenetic risk group</b>         |                                       |                                              |                                              | 0.54                  |
| <i>Good</i>                           | 103 (21)                              | 0 (0)                                        | 0 (0)                                        |                       |
| <i>Intermediate</i>                   | 269 (53)                              | 11 (92)                                      | 25 (96)                                      |                       |
| <i>Poor</i>                           | 102 (21)                              | 1 (8)                                        | 1 (4)                                        |                       |
| <i>Unknown</i>                        | 12 (2)                                | 0 (0)                                        | 0 (0)                                        |                       |
| <b>Cytogenetics<sup>†</sup></b>       |                                       |                                              |                                              |                       |
| <i>Normal cytogenetics</i>            | 187 (38)                              | 7 (58)                                       | 20 (77)                                      | 0.27                  |
| <i>t(15;17)</i>                       | 25 (5)                                | 0 (0)                                        | 0 (0)                                        | NA                    |
| <i>t(8;21)</i>                        | 37 (8)                                | 0 (0)                                        | 0 (0)                                        | NA                    |
| <i>Inv(16)</i>                        | 41 (8)                                | 0 (0)                                        | 0 (0)                                        | NA                    |

|                          |        |        |       |       |
|--------------------------|--------|--------|-------|-------|
| <i>11q23</i>             | 22 (5) | 0 (0)  | 0 (0) | NA    |
| <i>3q</i>                | 20 (4) | 0 (0)  | 0 (0) | NA    |
| <i>-5(q)</i>             | 15 (3) | 0 (0)  | 1 (4) | >0.99 |
| <i>-7(q)</i>             | 35 (7) | 1 (8)  | 1 (4) | 0.54  |
| <i>+chr8</i>             | 35 (7) | 2 (17) | 0 (0) | 0.094 |
| <i>Complex karyotype</i> | 32 (7) | 1 (8)  | 0 (0) | 0.32  |

WBC indicates white blood cell count; FAB, French-American-British classification; and NA, not applicable.

Numbers of cases or median (range) are depicted where appropriate.

*P* values are indicated for the comparison between *CEBPA*<sup>double-mut</sup> and *CEBPA*<sup>single-mut</sup> AML using the two-sided Fisher exact test (categorical variables) and Mann-Whitney test (continuous variables). A *P* value lower than 0.05 has been marked (\*).

† Each abnormality was taken into account, irrespective of the presence of other abnormalities.
