# Supplementary material
Source: PubMed Central journal article supplement (PMC2662648)
Supplement: blood-2008-09-179895_7.pdf [file blood-2008-09-179895_7.pdf]

|                                      | Overall survival   |            | Event-free survival |            |
|--------------------------------------|--------------------|------------|---------------------|------------|
| A.                                   | HR (95% CI)        | <i>P</i> * | HR (95% CI)         | <i>P</i> * |
| <i>CEBPA</i> <sup>single-mut †</sup> | 1.08 (0.48 – 2.45) | 0.85       | 1.55 (0.72 – 3.33)  | 0.26       |
| <i>CEBPA</i> <sup>double-mut †</sup> | 0.31 (0.15 – 0.61) | <0.001*    | 0.34 (0.19 – 0.62)  | <0.001*    |
| Intermediate‡                        | 2.50 (1.67 – 3.74) | <0.001*    | 2.24 (1.57 – 3.21)  | <0.001*    |
| Poor‡                                | 3.74 (2.48 – 5.65) | <0.001*    | 3.06 (2.11 – 4.43)  | <0.001*    |
| Age [decades]                        | 1.13 (1.02 – 1.26) | 0.019*     | 1.09 (0.99 – 1.20)  | 0.093      |
| WBC <sup>§</sup>                     | 1.35 (1.04 – 1.75) | 0.024*     | 1.31 (1.03 – 1.67)  | 0.029*     |
| <i>FLT3</i> -ITD <sup> </sup>        | 1.59 (1.19 – 2.11) | 0.0014*    | 1.44 (1.10 – 1.89)  | 0.0088*    |
| <i>NPM1</i> <sup> </sup>             | 0.50 (0.37 – 0.69) | <0.001*    | 0.47 (0.35 – 0.63)  | <0.001*    |
|                                      |                    |            |                     |            |
| B.                                   | HR (95% CI)        | <i>P</i> * | HR (95% CI)         | <i>P</i> * |
| <i>CEBPA</i> <sup>single-mut †</sup> | 1.81 (0.72 – 4.56) | 0.21       | 1.46 (0.57 – 3.61)  | 0.44       |
| <i>CEBPA</i> <sup>double-mut †</sup> | 0.43 (0.22 – 0.86) | 0.017*     | 0.45 (0.24 – 0.84)  | 0.012*     |
| Age [decades]                        | 1.16 (1.01 – 1.32) | 0.035*     | 1.06 (0.94 – 1.20)  | 0.33       |
| WBC <sup>§</sup>                     | 1.83 (1.22 – 2.74) | 0.0035*    | 1.40 (0.96 – 2.04)  | 0.079      |
| <i>FLT3</i> -ITD <sup> </sup>        | 1.59 (1.09 – 2.32) | 0.016*     | 1.57 (1.10 – 2.25)  | 0.012*     |
| <i>NPM1</i> <sup> </sup>             | 0.47 (0.32 – 0.70) | <0.001*    | 0.48 (0.33 – 0.70)  | <0.001*    |

HR indicates hazard ratio; CI, confidence interval; WBC, white blood cell count, *FLT3*, fms-related tyrosine kinase 3; ITD, internal tandem duplication; and *NPM1*, nucleophosmin.

\* *P* value < 0.05

† *CEBPA* status versus *CEBPA*<sup>wt</sup>

‡ Cytogenetic risk versus cytogenetic good risk § White blood cell count higher than  $20 \times 10^9/L$  versus lower than  $20 \times 10^9/L$

| *FLT3*-ITD versus no *FLT3*-ITD

| *NPM1* mutation versus no *NPM1* mutation
